# Supplementary material
Source: publisher figshare collection journal article supplement (https://karger.figshare.com/articles/dataset/_/7308467)
Supplement: Supplementary file 1 [file 1]

**Table S1.** The recovery of estrous cycle in rats (43 days old).

|          | Total number | Recovery<br>number |
|----------|--------------|--------------------|
| Control  | 8            | 8                  |
| DHEA *** | 8            | 1                  |
| DHEA+HLF | 7            | 3                  |
| HLF      | 6            | 6                  |

Control vs. DHEA, \*\*\* $p < 0.001$ ; DHEA vs. DHEA+HLF group,  $p > 0.05$ , chi-square test.

**Table S2.** The recovery of estrous cycle in rats (73 days old).

|            | Total number | Recovery<br>number |
|------------|--------------|--------------------|
| Control    | 6            | 6                  |
| DHEA**     | 7            | 1                  |
| DHEA+HLF # | 7            | 6                  |

Control vs. DHEA, \*\* $p < 0.01$ ; DHEA vs. DHEA+HLF group, # $p < 0.01$ , chi-square test.
