# Supplementary material
Source: publisher figshare collection journal article supplement (https://karger.figshare.com/articles/dataset/_/7308467)
Supplement: Supplementary file 2 [file 1]

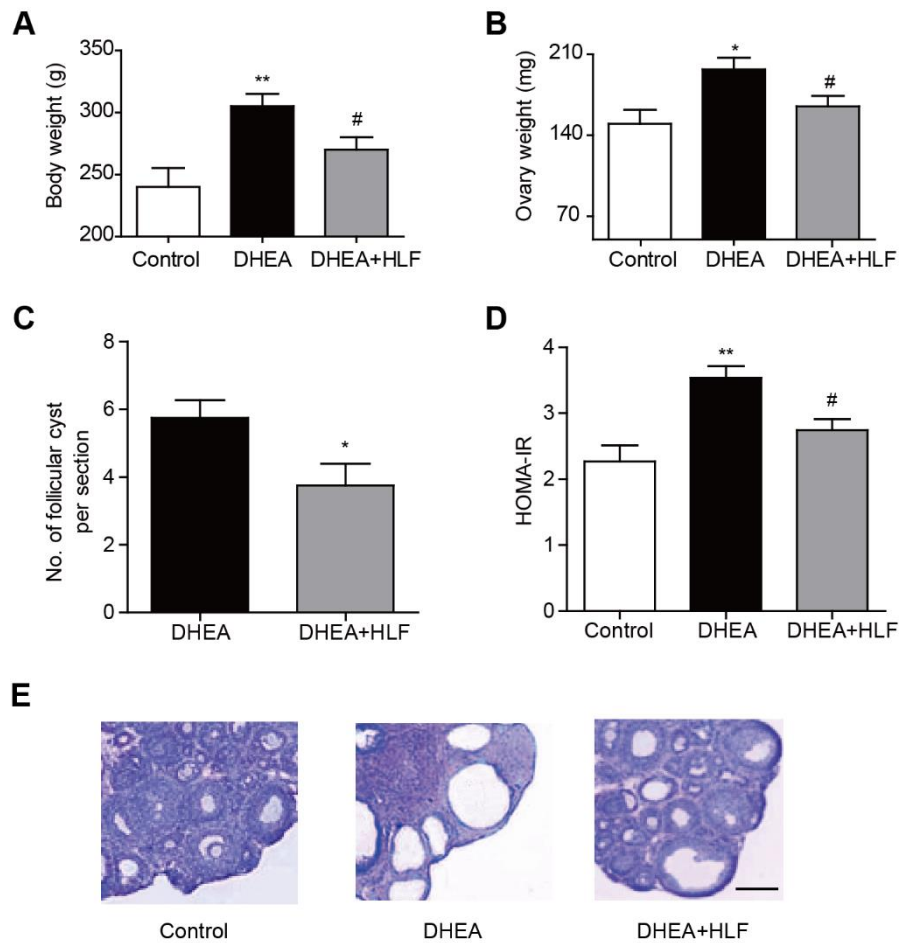

**Figure S1. Effect of HLF on the PCOS in the rats after the model was established.** (A) The body weight. (B) The ovarian weight. (C) Number of follicular cysts. (D) HOMA-IR of each group. (E) H&E staining photos of ovaries in three groups. Scale bar = 50  $\mu$ m.

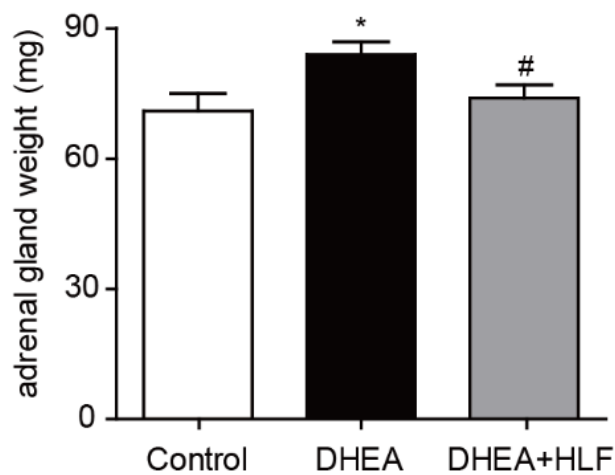

**Figure S2. The weight of adrenal gland in three groups.** Post-administration of HLF significantly decreased the weight of adrenal gland.
